# Supplementary material for: The mechanism of PI3Kα activation at the atomic level
Source: PubMed Central journal article supplement — Chem Sci. 2019 Feb 20;10(12):3671–80. doi: 10.1039/c8sc04498h (PMC6430085; doi:10.1039/c8sc04498h), 2019-02-20

**Table S1.** The salt bridges at the p110 $\alpha$ -p85  $\alpha$  interface in PI3K $\alpha$ .

| p85 $\alpha$ |         | p110 $\alpha$ |         | PI3K $\alpha$ | PI3K $\alpha_{\Delta nSH2}$ |
|--------------|---------|---------------|---------|---------------|-----------------------------|
| Domain       | Residue | Domain        | Residue |               |                             |
| nSH2         | R348    | C2            | D454    | 99.9%         | 0%                          |
| nSH2         | K374    | C2            | D369    | 40.1%         | 0%                          |
| nSH2         | K379    | Helical       | E542    | 99.3%         | 0%                          |
| nSH2         | K379    | Helical       | E545    | 74.8%         | 0%                          |
| nSH2         | K382    | Helical       | E547    | 30.2%         | 0%                          |
| nSH2         | K419    | Helical       | E579    | 63.4%         | 0%                          |
| nSH2         | D421    | Helical       | K548    | 41.8%         | 0%                          |
| nSH2         | D421    | Helical       | K573    | 89.0%         | 0%                          |
| nSH2         | R340    | Kinase        | D1029   | 100%          | 0%                          |
| nSH2         | E341    | Kinase        | R1023   | 99.9%         | 0%                          |
| nSH2         | E345    | Kinase        | K1024   | 99.1%         | 0%                          |
| nSH2         | R348    | Kinase        | D1017   | 100%          | 0%                          |
| nSH2         | D359    | Kinase        | K1030   | 65.9%         | 0%                          |
| nSH2         | K363    | Kinase        | E1037   | 52.5%         | 0%                          |
| iSH2         | E489    | ABD           | R79     | 96.2%         | 99.8%                       |
| iSH2         | E496    | ABD           | K100    | 72.2%         | 74.1%                       |
| iSH2         | R534    | ABD           | E23     | 100%          | 99.4%                       |
| iSH2         | R557    | C2            | E469    | 56.1%         | 82.3%                       |
| iSH2         | D569    | C2            | R412    | 56.1%         | 30.3%                       |
| iSH2         | R574    | C2            | E453    | 99.1%         | 0%                          |
| iSH2         | K575    | C2            | E418    | 60.0%         | 84.1%                       |
| iSH2         | D464    | Kinase        | K944    | 88.6%         | 0%                          |

The salt bridge interacting residue pairs are considered when the distance between any of atoms in the acidic and basic residues is within the cut-off distance of 3.5 Å. The salt bridges with the probability > 30% are shown. The residue contact with significant change upon nSH2 release is highlighted in blue.

**Table S2.** The hydrophobic interactions at the p110 $\alpha$ -p85  $\alpha$  interface in PI3K $\alpha$ .

| p85 $\alpha$ |         | p110 $\alpha$ |         | PI3K $\alpha$ | PI3K $\alpha_{\Delta nSH2}$ |
|--------------|---------|---------------|---------|---------------|-----------------------------|
| Domain       | Residue | Domain        | Residue |               |                             |
| iSH2         | M479    | ABD           | W11     | 100%          | 100%                        |
| iSH2         | A483    | ABD           | W11     | 100%          | 100%                        |
| iSH2         | A483    | ABD           | F95     | 100%          | 100%                        |
| iSH2         | A486    | ABD           | W11     | 97.1%         | 99.2%                       |
| iSH2         | A486    | ABD           | V73     | 100%          | 100%                        |
| iSH2         | A486    | ABD           | A77     | 96.7%         | 95.1%                       |
| iSH2         | A486    | ABD           | F95     | 100%          | 100%                        |
| iSH2         | A486    | ABD           | F98     | 89.6%         | 97.8%                       |
| iSH2         | F487    | ABD           | W11     | 98.2%         | 95.3%                       |
| iSH2         | F487    | ABD           | V73     | 100%          | 100%                        |
| iSH2         | F487    | ABD           | F95     | 100%          | 100%                        |
| iSH2         | I493    | ABD           | L25     | 100%          | 100%                        |
| iSH2         | I493    | ABD           | V71     | 100%          | 100%                        |
| iSH2         | I493    | ABD           | V73     | 100%          | 100%                        |
| iSH2         | I493    | ABD           | P98     | 100%          | 100%                        |
| iSH2         | F494    | ABD           | L25     | 100%          | 100%                        |
| iSH2         | F494    | ABD           | I31     | 100%          | 99.9%                       |
| iSH2         | F494    | ABD           | F98     | 100%          | 100%                        |
| iSH2         | I524    | ABD           | M30     | 100%          | 99.9%                       |
| iSH2         | I524    | ABD           | P57     | 100%          | 100%                        |
| iSH2         | I524    | ABD           | L58     | 100%          | 99.9%                       |
| iSH2         | L531    | ABD           | L25     | 100%          | 100%                        |
| iSH2         | L531    | ABD           | M30     | 100%          | 99.8%                       |
| iSH2         | L531    | ABD           | I31     | 100%          | 100%                        |
| iSH2         | I538    | ABD           | F95     | 98.8%         | 98.7%                       |
| iSH2         | I538    | ABD           | F98     | 97.7%         | 97.4%                       |
| iSH2         | P568    | C2            | I351    | 99.4%         | 99.6%                       |
| iSH2         | P568    | C2            | A415    | 77.7%         | 38.0%                       |
| iSH2         | P568    | C2            | P421    | 90.1%         | 99.2%                       |
| iSH2         | P568    | C2            | L422    | 84.9%         | 100%                        |
| iSH2         | I571    | C2            | A415    | 70.9%         | 15.9%                       |
| iSH2         | I571    | C2            | P421    | 97.7%         | 99.2%                       |
| iSH2         | I571    | C2            | L452    | 97.4%         | 100%                        |

The hydrophobic interacting residue pairs are considered when the distance between any of atoms in the hydrophobic residues is within the cut-off distance of 6.5 Å. The hydrophobic interactions with the probability > 30% are shown. The residue contact with significant change upon nSH2 release is highlighted in blue.

**Figure S1.** The time-dependent domain (a) angle and (b) distance profiles of p110 $\alpha$  upon nSH2 release.

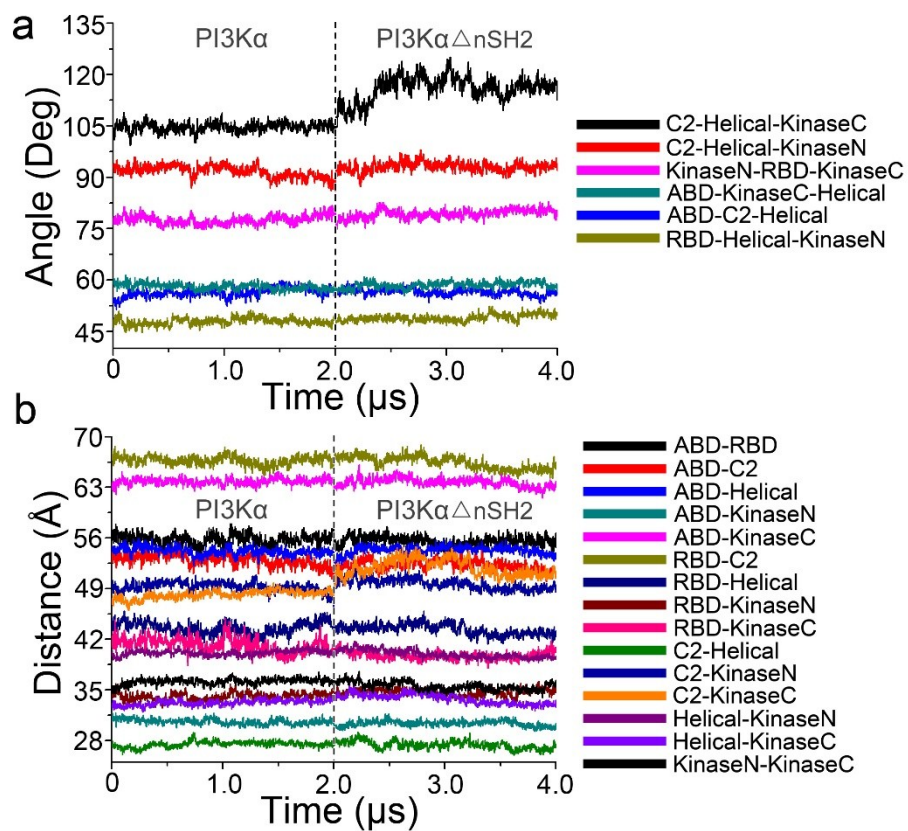

**Figure S2.** Results of principal component analysis (PCA). MD snapshots for inactive PI3K $\alpha$  and active PI3K $\alpha\Delta$ nSH2 are projected onto the first and second PCs.

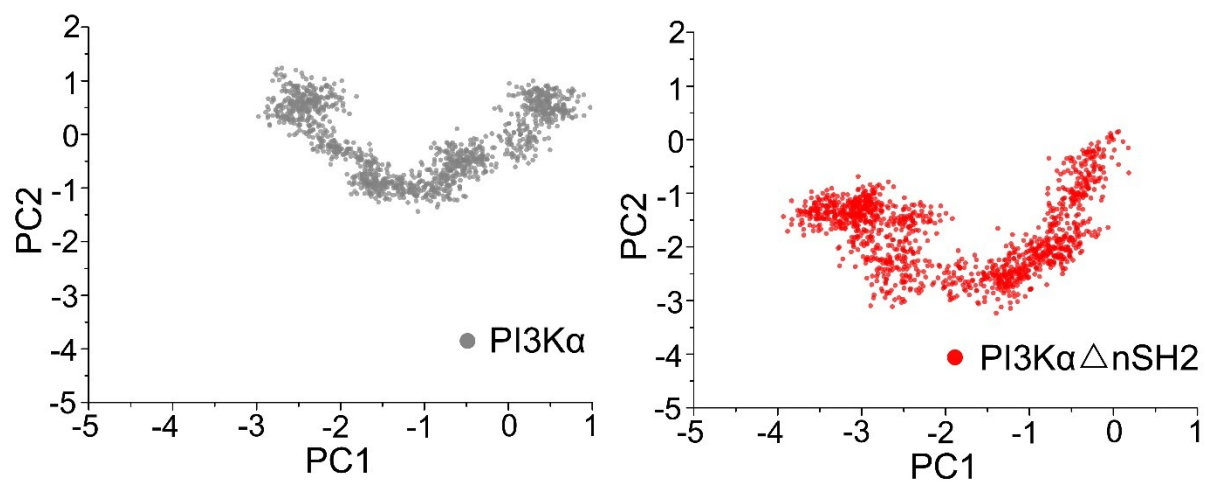

**Figure S3.** Disruption of the salt bridges at (a) iSH2-C2 interface and (b) iSH2-kinase interface, and (c) the change of the solvent-accessible surface areas (SASA) of kinaseC upon PI3K $\alpha$  activation by nSH2 release.

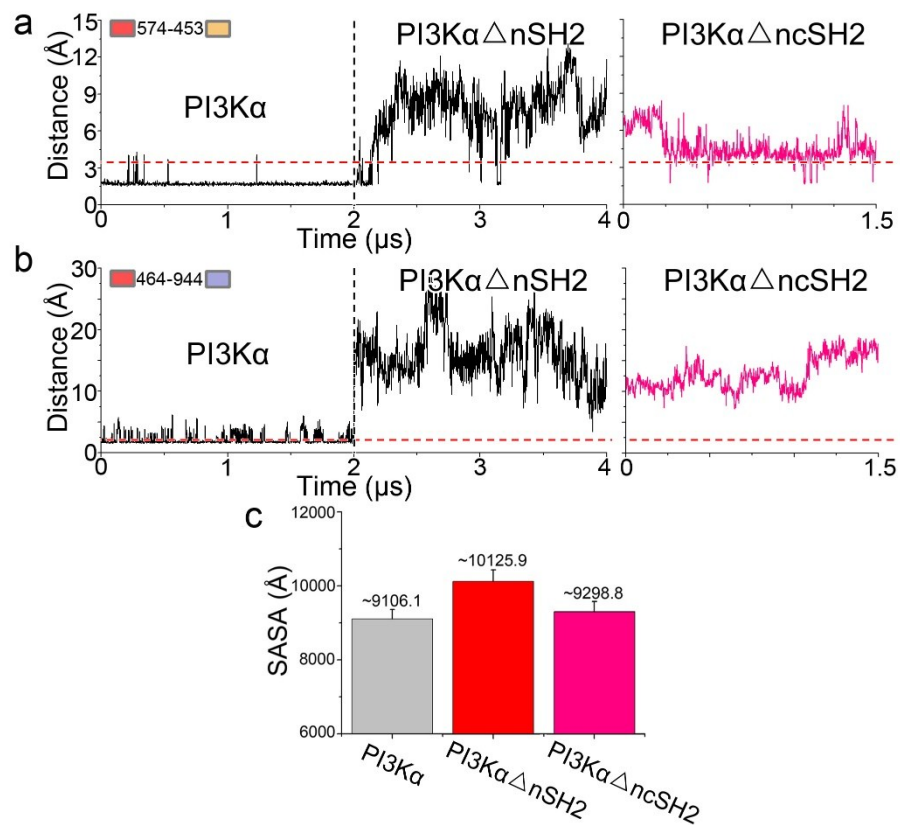

**Figure S4.** Conformation change of ABD-RBD linker in PI3K $\alpha$  upon nSH2 release.

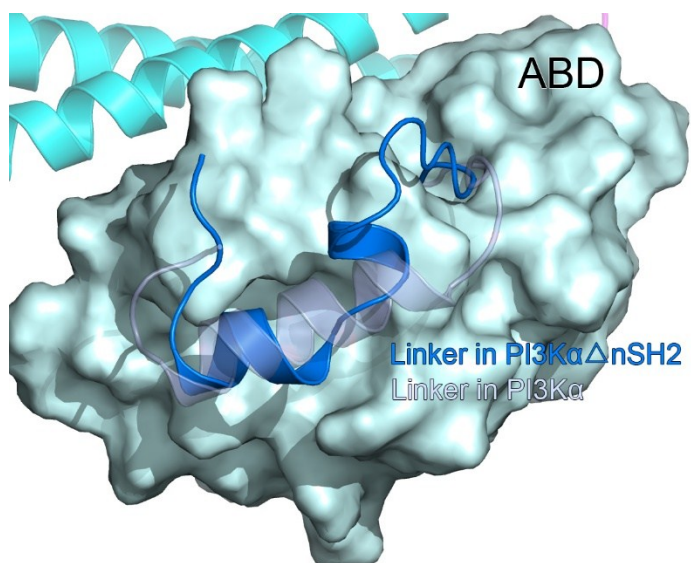

**Figure S5.** (a) Membrane contacting probability and (b) the snapshot for residues in iSH2 domain interacting with membrane in the active PI3K $\alpha$  with nSH2 released. The membrane surface is defined by the positions of  $_{\text{kinase}}\text{Glu}^{726}$ ,  $_{\text{kinase}}\text{His}^{1047}$  and  $_{\text{kinase}}\text{Lys}^{942}$  in the kinase domain. The residues with high membrane contacting probability is highlighted in orange.

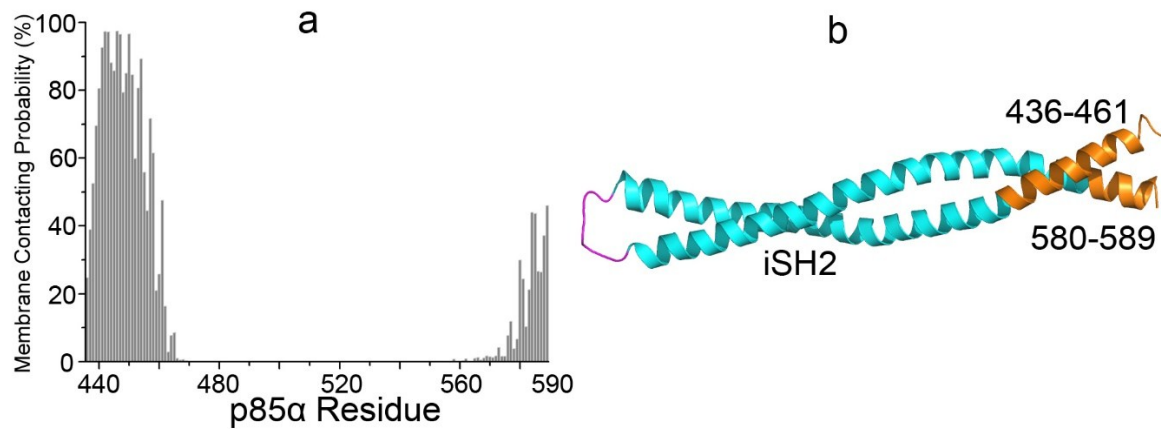

**Figure S6.** 2D RMSD plots for ABD, RBD, C2, helical domain, kinaseN in p110 $\alpha$  upon PI3K $\alpha$  activation by nSH2 release.

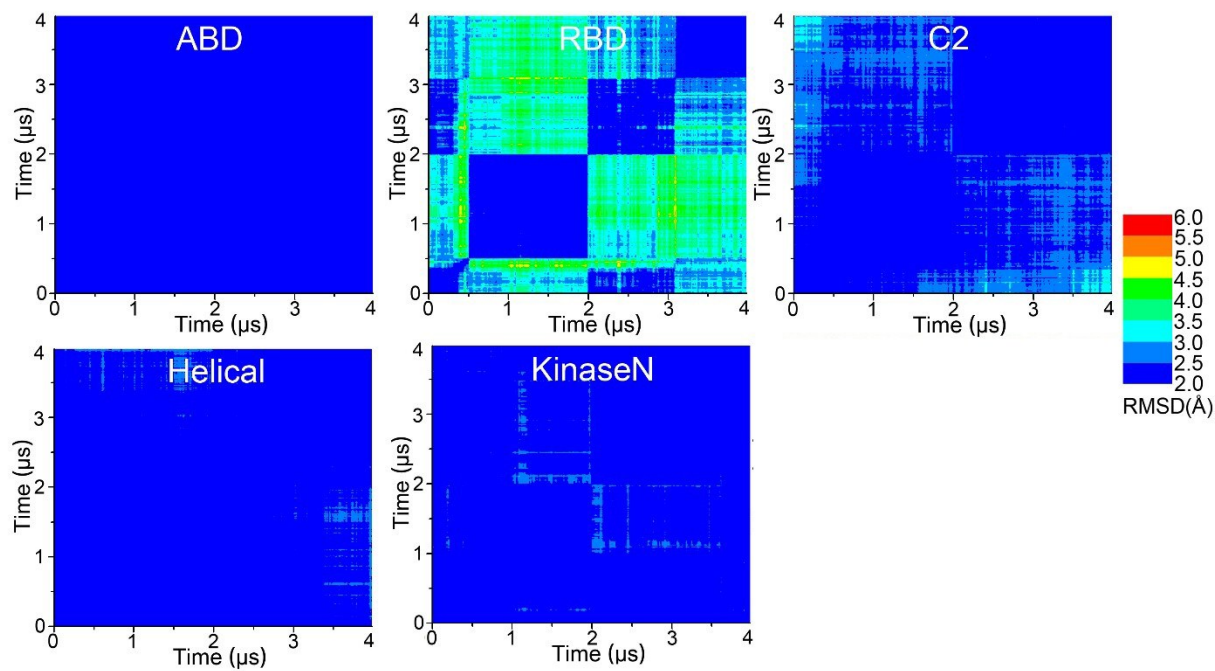



**Figure S7.** Structural rearrangement of kinaseC in PI3K $\alpha$  upon nSH2 release. (a) The residue-based RMSD values show that six fragments in kinaseC experience significant conformational change. (b) The snapshot shows that these fragments (highlighted in orange) are located at the surface of kinaseC.

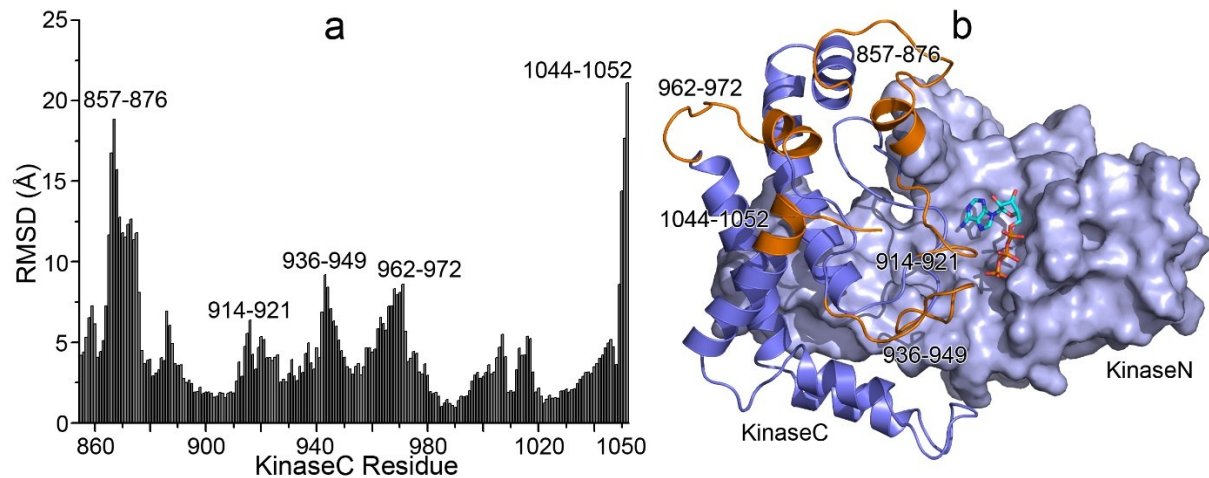

**Figure S8.** Catalytic site in the active PI3K $\alpha$ . (a) Schematic illustration of catalytic site of PI3K $\alpha$ . The distances of (b) Lys<sup>941-944</sup> and (c) His<sup>936</sup> to ATP are reduced upon nSH2 release.

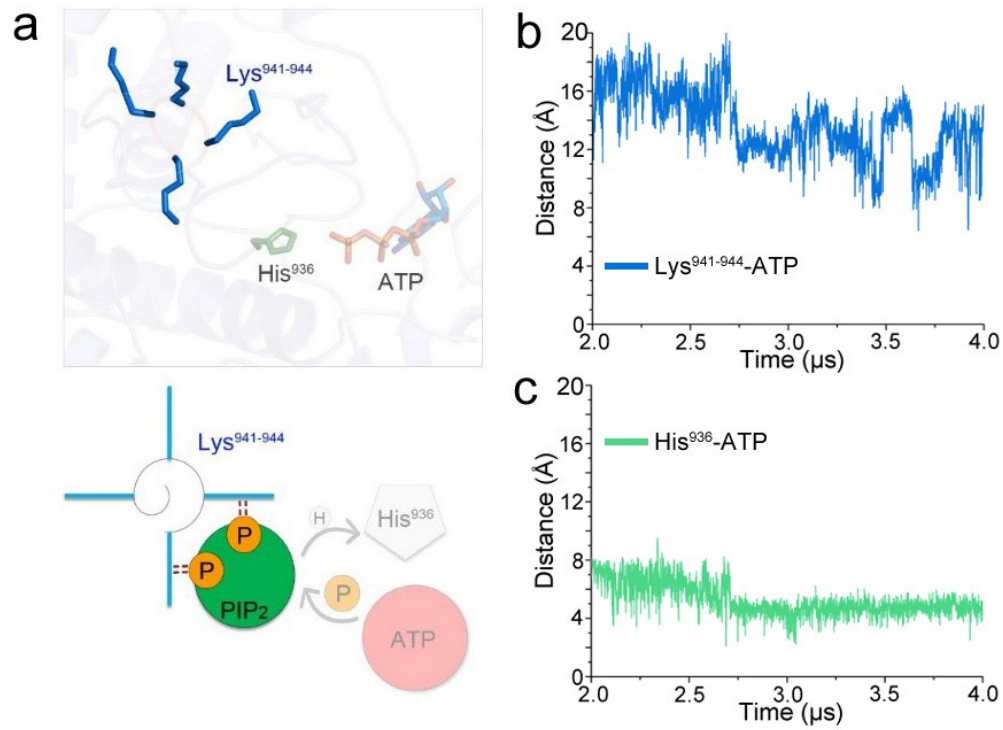

**Figure S9.** cSH2 domain in PI3K $\alpha$ . By two different strategies, cSH2 is modeled into PI3K $\alpha$  (*a*) based on the crystal structure of PI3K $\beta$ , and (*b*) by docking. In both PI3K $\alpha$  structures, cSH2 interacts with kinase domain in p110 $\alpha$ . The RMSF profiles for the (*c*) superimposed and (*d*) docked cSH2 in PI3K $\alpha$  suggest that the interactions of cSH2 to p110 $\alpha$  are less stable, compared to nSH2 and iSH2 in p85 $\alpha$ .

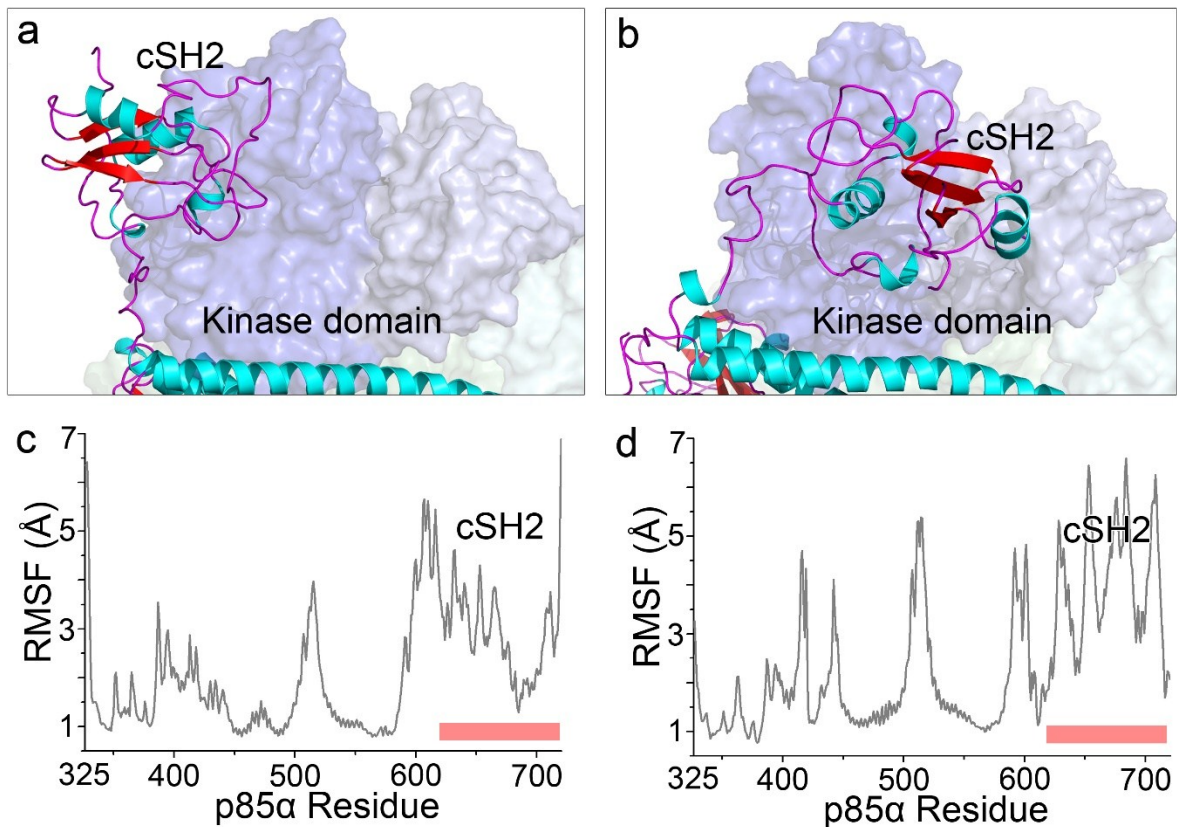

**Figure S10.** Schematic illustration for PI3K $\alpha$  activation by nSH2 release. In the inactive PI3K $\alpha$ , the kinase domain cannot access the membrane because of steric clash of iSH2 domain, and the PIP<sub>2</sub>-ATP distance is too far for substrate phosphorylation. The pY motifs in RTK activate PI3K $\alpha$  by releasing the nSH2 domain. nSH2 release triggers significant conformation change in p110 $\alpha$ , making kinaseC more exposed for interacting with the membrane. Upon the nSH2 release, the structural arrangement in kinaseC lead to a reduced PIP<sub>2</sub>-ATP distance suitable for substrate phosphorylation. Ras interacts with the RBD in p110 $\alpha$  recruits PI3K $\alpha$  onto membrane.

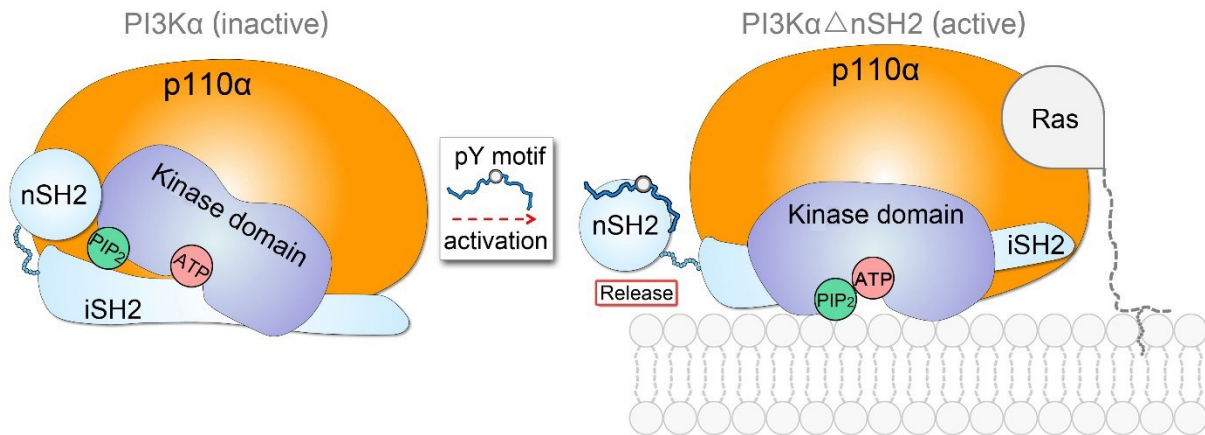

**Figure S11.** Summary of simulation systems.

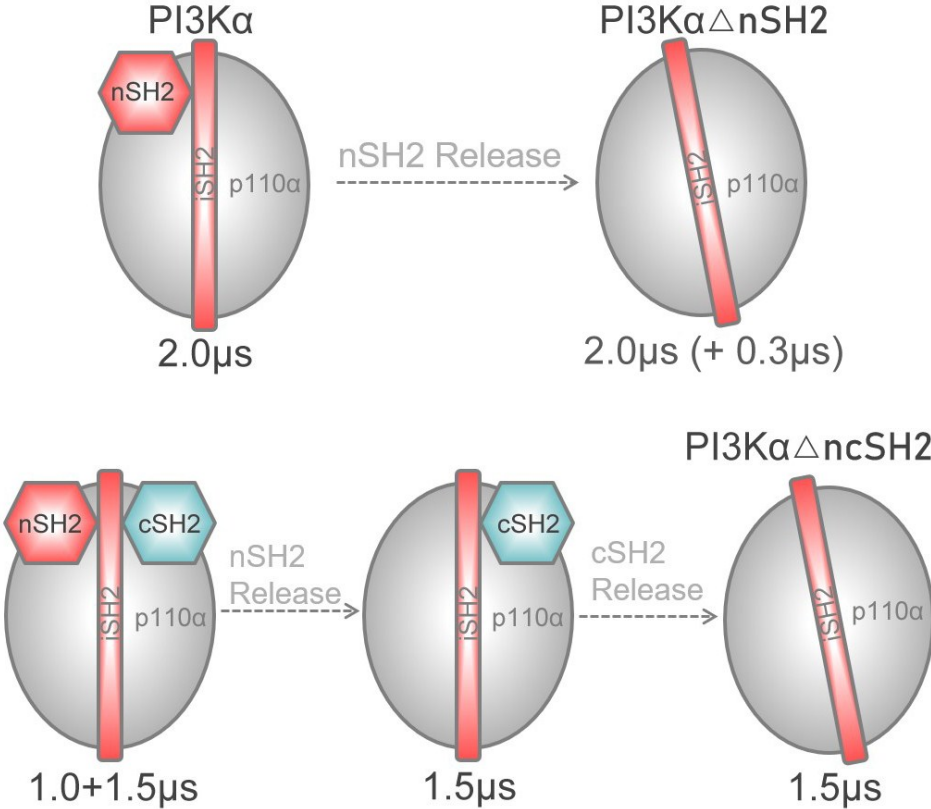

Supplement: SC-010-C8SC04498H-s003.pdf [file SC-010-C8SC04498H-s003.pdf]
